# **Viral coinfection is shaped by bacterial ecology and virus-virus interactions across diverse microbial taxa and environments**

Samuel L. Díaz Muñoz<sup>#</sup>

Center for Genomics and Systems Biology  
Department of Biology  
New York University, New York, NY, USA

<sup>#</sup>Address correspondence to: Samuel L. Díaz Muñoz, [sam.diazmunoz@nyu.edu](mailto:sam.diazmunoz@nyu.edu)

## **Abstract**

Viral coinfection is a common across taxa and environments. Coinfection can enable genetic exchange, alter the dynamics of infections, and change the course of viral evolution. Despite the importance of coinfection to viral ecology and evolution, the factors that influence the frequency and extent of viral coinfection remain largely unexplored. Here I employ an extensive data set of virus-host interactions representing 6,564 microbial hosts and 13,103 viruses, to test the importance of bacterial traits and virus-virus interactions in shaping coinfection dynamics across a wide variety of taxa and environments. Using data from phage-host infection matrices, I found that bacterial ecology was the most important factor explaining variation (>28%) in the potential for coinfection. Realized (actual) coinfection was affected by bacterial defense mechanisms at the single-cell level. In a natural environment, the presence of CRISPR spacers in marine bacteria limited coinfections with active viruses by ~50%, despite the absence of spacer matches in any active infection. Analysis of viral infections mined from published bacterial and archaeal sequence data (n= 5,492 hosts), showed prophages limited coinfection of host cultures by other prophages, but not extrachromosomal viruses. At the single-cell level, prophages virtually eliminated coinfection. Virus-virus interactions also enhanced coinfection with culture coinfection by ssDNA and dsDNA viruses twice as likely to occur than ssDNA-only coinfections. Collectively, these results suggest bacterial ecology and virus-virus interactions are strong drivers of coinfection across different taxa and environments. These findings highlight that virus-virus interactions constitute an important selective pressure on viruses that is often underappreciated.

## 33 **Introduction**

34 Viruses outnumber hosts by a significant margin (Bergh *et al.*, 1989; Suttle, 2007;  
35 Weinbauer, 2004; Rohwer & Barott, 2012). In this situation, infection of more than one  
36 virus in a host (coinfection) might be expected to be a rather frequent occurrence  
37 potentially leading to virus-virus interactions (Bergh *et al.*, 1989; Díaz-Muñoz &  
38 Koskella, 2014; Suttle, 2007; Weinbauer, 2004; Rohwer & Barott, 2012). Across many  
39 different viral groups, virus-virus interactions within a host can alter genetic exchange  
40 (Worobey & Holmes, 1999), modify relative fitness (Refardt, 2011; Dropulić *et al.*,  
41 1996), and change the course of viral evolution (Turner & Chao, 1998). Sustained within-  
42 host competition can lead to the evolution of viral strategies to compete against  
43 coinfecting viruses, such as frequency-dependent reproductive strategies (Turner & Chao,  
44 1999; 2003) and adaptive lysis timing (Leggett *et al.*, 2013). Experimental studies  
45 provide evidence of the powerful consequences of virus-virus interactions for the fate of  
46 the host (Vignuzzi *et al.*, 2006; Li *et al.*, 2010; Abrahams *et al.*, 2009) and subsequent  
47 viral evolution (Ghedin *et al.*, 2005). Yet, there is little information regarding the  
48 ecological dimensions of coinfection and virus-virus interactions. This dearth of  
49 information may explain why virus-virus interactions are underappreciated as a selective  
50 force on viruses (DaPalma *et al.*, 2010). Given that most laboratory studies of viruses  
51 focus on a single virus at a time (DaPalma *et al.*, 2010), understanding the drivers and  
52 dynamics of coinfection and virus-virus interactions is a pressing frontier for viral  
53 ecology.

54  
55 Recent studies of bacteriophages have started shedding light on the ecology of viral  
56 coinfection. In particular, mounting evidence indicates that many bacterial hosts can be  
57 infected by more than one phage (Koskella & Meaden, 2013; Flores *et al.*, 2013; 2011),  
58 suggesting there is potential for viral coinfection. Studies mining sequence data to  
59 uncover virus-host relationships have uncovered widespread coinfection in publicly  
60 available bacterial and archaeal genome sequence data (Roux *et al.*, 2015) and provided,  
61 for the first time, single-cell level information on viruses associated to specific hosts  
62 isolated from the environment in a culture-independent manner (Roux *et al.*, 2014;  
63 Labonté *et al.*, 2015). Collectively, these studies suggest that there is a large potential for

64 coinfection and that this potential is realized at both the host culture and single cell level.  
65 A summary of these studies suggests roughly half of hosts can be or are infected  
66 multiply, by an average of >2 viruses (Table 1). For the first time, there is extensive  
67 evidence across various methodologies, taxa, environments, and levels of coinfection that  
68 coinfection is widespread and virus-virus interactions may be a frequent occurrence.

69

70 **Table 1.** *Viral coinfection is prevalent across various methodologies, taxa, environments, and levels of*  
71 *coinfection.*

|                                           | Potential<br>coinfection      | Culture-level<br>coinfection | Single-cell<br>coinfection  |
|-------------------------------------------|-------------------------------|------------------------------|-----------------------------|
| Number of viruses in coinfections         | 4.89 ( $\pm$ 4.61)            | 3.377 $\pm$ 1.804            | 2.37 $\pm$ 0.83             |
| Prop of bacteria with multiple infections | 0.654                         | 0.538                        | 0.450                       |
| Reference                                 | (Flores <i>et al.</i> , 2011) | (Roux <i>et al.</i> , 2015)  | (Roux <i>et al.</i> , 2014) |

72

73 Yet, if coinfection is a frequent occurrence in bacterial and archaeal hosts, what are the  
74 factors influencing coinfection patterns? What explains variation in this widespread  
75 phenomenon? To determine the frequency and extent of coinfection, there are two  
76 necessary conditions. First, as a necessary but not sufficient criterion, hosts must be able  
77 to be infected by the viruses independently, i.e. there must be a potential for coinfection.  
78 Studies of phage host range have provided a window into the potential for coinfection.  
79 For instance, in a single bacterial species there can be wide variation in phage host range  
80 (Holmfeldt *et al.*, 2007), and thus, the potential for coinfection. A larger scale,  
81 quantitative study of phage-bacteria infection networks suggests a continuum of potential  
82 coinfection, with some hosts susceptible to few viruses and others to many (Flores *et al.*,  
83 2011). However, information regarding the ecological and biological correlates of  
84 coinfection at the strain or species levels remains elusive. At broad scales, geographic  
85 separation may play a role in potential coinfection (Flores *et al.*, 2013). Thus, bacterial  
86 ecology and identity are the primary candidates for drivers of potential for coinfection, at  
87 least in lytic viruses examined by phage-bacteria host range studies.

88

89 Second, the potential for coinfection is not always realized, so a second necessary  
90 condition is that both the bacteria and infecting viruses allow simultaneous or sequential  
91 infection. An extensive collection of studies provides insight into the bacterial and viral  
92 mechanisms that may affect coinfection. Bacteria, understandably reluctant to welcome

93 viruses, possess a collection of mechanisms of defense against viral infection, including  
94 restriction enzymes (Murray, 2002; Linn & Arber, 1968) and CRISPR-Cas systems  
95 (Horvath & Barrangou, 2010). The latter have been shown to be an adaptive immune  
96 system for bacteria, protecting from future infection by the same phage (Barrangou *et al.*,  
97 2007) and preserving the memory of viral infections past (Held & Whitaker, 2009).  
98 Metagenomic studies of CRISPR in natural environments suggest rapid coevolution of  
99 CRISPR arrays (Tyson & Banfield, 2008), but little is known regarding *in-situ* protective  
100 effects of CRISPR on cells, which should now possible with single-cell genomics.

101  
102 Viruses also have mechanisms to mediate infection by other viruses, some of which were  
103 identified in some of the earliest lab studies of bacteriophages (Ellis & Delbruck, 1939;  
104 Delbruck, 1946). An example of a well-described phenomenon of virus-virus interactions  
105 is superinfection immunity conferred by lysogens (Bertani, 1953), which can inhibit  
106 coinfection of cultures and single cells (Bertani, 1954). While this mechanism has been  
107 described in several species, its frequency at broader taxonomic scales and its occurrence  
108 in natural settings is not well known. Most attention in virus-virus interactions has  
109 focused on mechanisms limiting coinfection, with the assumption that coinfection  
110 invariably reduces host fitness (Berngruber *et al.*, 2010). However, some patterns of non-  
111 random coinfection suggest elevated coinfection (Dang *et al.*, 2004; Cicin-Sain *et al.*,  
112 2005; Turner *et al.*, 1999) and there are viral mechanisms that promote co-infection  
113 (Joseph *et al.*, 2009). Systematic coinfection has been proposed (Roux *et al.*, 2012) to  
114 explain findings of chimeric viruses of mixed nucleic acids in metagenome reads (Diemer  
115 & Stedman, 2012; Roux *et al.*, 2013). This suspicion was confirmed in a study of marine  
116 bacteria that found highly non-random patterns of coinfection between ssDNA and  
117 dsDNA viruses in a lineage of marine bacteria (Roux *et al.*, 2014), but the frequency of  
118 this phenomenon across bacterial taxa remains to be uncovered. Thus, detailed molecular  
119 studies of coinfection dynamics and virome sequence data are generating questions ripe  
120 for testing across diverse taxa and environments.

121  
122 Here I employ an extensive data set of virus-host interactions to test the importance of  
123 bacterial traits and virus-virus interactions in explaining coinfection dynamics and

124 patterns across a wide variety of taxa and environments. Specifically, I aim to answer the  
125 following questions:

- 126 1) How do bacterial traits and sampling conditions explain variation in estimates of  
127 potential coinfection (how many phages can infect hosts)?
- 128 2) Do prophages limit the scope of coinfection of host cultures?
- 129 3) Do ssDNA and dsDNA viruses show evidence of preferential coinfection?
- 130 4) Do prophages limit coinfection of single cells?
- 131 5) Does the CRISPR bacterial defense mechanism limit coinfection of single cells?

132

133 Results suggest that bacterial ecology and identity explain most of the variability in  
134 potential coinfection. Bacterial defense and virus-virus interactions were important  
135 mediators of coinfection dynamics. At the culture level integrated viruses limited  
136 coinfection by other prophages, but not extrachromosomal viruses, whereas CRISPR  
137 spacers and integrated viruses in single cells severely limited any further infection.  
138 However, systematic coinfection of host cultures by ssDNA and dsDNA viruses  
139 suggested virus-virus interactions can also promote coinfection.

## 140 **Materials and Methods**

### 141 *Data Sets*

142 I assembled data collectively representing 13,103 viral infections in 6,564 bacterial and  
143 archaeal hosts from diverse environments. These data are composed of three data sets that  
144 provide an increasingly fine-grained examination of coinfection from potential to realized  
145 coinfection at the culture (pure cultures or single colonies, not necessarily single cells)  
146 and single-cell levels.

147

148 The first data set is composed of bacteriophage host-range infection matrices  
149 documenting the results of experimental attempts at lytic infection in cultured phage and  
150 hosts (2011) and provides information on potential coinfection by compiling results from  
151 38 published studies. The host-range infection data are matrices of infection success or  
152 failure via the “spot test”, briefly, a drop of phage lysate is “spotted” on a bacterial lawn  
153 and lysing of bacteria is noted as presence or absence. This data set represents studies

154 with varying sample compositions, in terms of bacteria and phage species, bacterial  
155 trophic, source of samples, bacterial association, and isolation habitat.

156

157 The second data set is derived from viral sequence information mined from published  
158 microbial genome sequence data on NCBI databases. Thus, this second data set provided  
159 information on actual (as opposed to potential) coinfection of cultures, including  
160 integrated and extrachromosomal viruses representing 12,498 viral infections in 5,492  
161 bacterial and archaeal hosts. The data set includes data on viruses that are incorporated  
162 into the host genome (prophages) as well as extrachromosomal viruses detected in the  
163 genome assemblies (representing chronic, carrier state, and ‘extrachromosomal prophage’  
164 infections). Genomes of microbial strains were primarily generated from colonies or pure  
165 cultures (except for 27 hosts known to be represented by single cells). Thus, although  
166 these data could represent coinfection potential coinfections at the single cell level, they  
167 are more conservatively regarded as culture coinfections.

168

169 The third data set included single-cell amplified genomes, providing information on  
170 coinfection and virus-virus interactions within single cells. This data set is composed of  
171 data from a study identifying viruses of 127 single cells of SUP05 marine bacteria in an  
172 oxygen minimum zone in the ocean (Roux *et al.*, 2014). These single-cell data represent a  
173 combined 143 viral infections including past and current (active) infections. The data set  
174 also identifies past infections (CRISPRs and prophages) and current infections (that is  
175 current at the time of isolation, e.g. ongoing lytic infections) in bacterial cells.

176

177 A list and description of data sources are included in Supplementary Table 1, and the raw  
178 data used in this paper are deposited in the FigShare data repository (FigShare  
179 doi:[10.6084/m9.figshare.2072929](https://doi.org/10.6084/m9.figshare.2072929)).

### 180 ***Factors explaining potential coinfection***

181 To test the potential influence of such factors on the estimate of phage infecting each  
182 host, I conducted a factorial analysis of variance (ANOVA). The independent (factorial)  
183 variables tested were the study type/source (natural, coevolution, artificial), bacterial  
184 taxon, habitat from which bacteria and phages were isolated, bacterial trophic

185 (photosynthetic and heterotrophic), and bacterial association (e.g. pathogen, free-living).  
186 Geographic origin and phage taxa were present in the metadata, but were largely  
187 incomplete; therefore they were not included in the analyses. Because the infection  
188 matrices were derived from different studies testing varying numbers of phages, I  
189 conducted ANOVA on the proportion of phage tested that infected a given host. The  
190 same data were also analyzed using an arc-sine transform ANOVA and a binomial  
191 logistic regression.

### 192 *Effect of integrated prophages on coinfection of cultures*

193 To determine whether prophages affected the frequency and extent of coinfection in host  
194 cultures, I examined host cultures infected exclusively by prophages or  
195 extrachromosomal viruses (representing chronic, carrier state, and ‘extrachromosomal  
196 prophage’ infections) and all prophage-infected cultures. I tested whether prophage-only  
197 coinfections were infected by a different average number of viruses compared to  
198 extrachromosomal-only using a Wilcoxon Rank Sum test. I tested whether prophage  
199 infected cultures were more likely than not to be coinfections, and whether these  
200 coinfections were more likely to occur with additional prophages or extrachromosomal  
201 viruses.

### 202 *Culture coinfection by ssDNA and dsDNA*

203 To examine whether ssDNA and dsDNA viruses exhibited non-random patterns of  
204 culture coinfection, I compared the frequency of dsDNA-ssDNA mixed coinfections  
205 against ssDNA-only coinfections among all host cultures coinfecting with at least one  
206 ssDNA virus, using a binomial test.

### 207 *Effect of prophages and CRISPR on coinfection*

208 I investigated the effect of prophages and CRISPR spacers on coinfection in single cells,  
209 by analyzing a data set of single amplified genomes (Roux *et al.*, 2014). This genomic  
210 data set identified viral infections, including past, temperate and lytic infections in 67  
211 SUP-05 bacteria (sulfur-oxidizing Gammaproteobacteria) isolated from different depths  
212 of the oxygen minimum zone in the Saanich Inlet on Vancouver Island, British  
213 Columbia.

214

215 To examine the effect of past infections on the frequency of cells undergoing current  
216 (active) infections, I examined cells that harbored putative defective prophages and  
217 CRISPR spacers in the genome and calculated the proportion of those that also had  
218 current (active) infections. To determine the extent of coinfection in cells with putative  
219 defective prophages and CRISPR spacers, I calculated the average number of active  
220 viruses infecting these cells. I examined differences in the frequency of current infection  
221 between bacteria with or without past infections using a proportion test and differences in  
222 the average amount of current viral infections using a Wilcoxon rank sum test.

### 223 *Statistical Analyses*

224 I conducted all statistical analyses in the R statistical programming environment (Team,  
225 2011) and generated graphs using the ggplot2 package. Means are presented as means  $\pm$   
226 standard deviation, unless otherwise stated. Data and code for analyses and figures are  
227 available in the Figshare data repository (doi: [10.6084/m9.figshare.2072929](https://doi.org/10.6084/m9.figshare.2072929)).

## 228 **Results**

### 229 *Bacterial ecology and identity explain variation in potential for* 230 *coinfection*

231 To test whether sampling or bacterial and phage characteristics affected estimates of  
232 potential coinfection, I conducted an analysis of variance on 38 studies from the host-  
233 range data set for which these metadata were available. The full model explained 37.25%  
234 of the variance in potential for coinfection, with bacterial/phage ecology explaining  
235 >28% of the variance. The isolation habitat of phage and bacteria was the factor that  
236 explained the most variation (19.98%) between potential coinfection estimates. Microbes  
237 isolated from clinical isolates had the highest median potential coinfection, followed by  
238 sewage/dairy products, soil, sewage, and laboratory chemostats. All these habitats had  
239 more than 75% of tested phage infecting each host on average (Figure 1A). In absolute  
240 terms, the average host in each of these habitats could be infected by 3-15 different  
241 phages. Bacterial association explained 8.70% of the variance in potential coinfection.  
242 Bacteria that were pathogenic to cows had the highest potential coinfection followed by  
243 plant symbionts; both had more than 75% of tested phage infecting each bacteria (Figure  
244 1B). In absolute terms, the average host that was a pathogenic to cows could be infected  
245 15 phages on average, whereas plant symbionts could be infected by 3. The type of study



246 that served as the source of isolated strains explained 5.68% of variation, with  
 247 coevolutionary studies and artificial pairings of laboratory strains (i.e. strains selected for  
 248 their availability in laboratory stock collections) having higher potential coinfection than  
 249 ecological studies (Figure 1D). Finally, the only other statistically significant factors  
 250 explaining variation in potential coinfection were bacterial trophism (1.67%) and bacterial  
 251 taxa (1.22%) and (Figure 1C, 1E). A reduced ANOVA model, generated by stepwise  
 252 model selection with AIC, explained 30% of the variance with only three factors (Figure  
 253 1, outlined in blue): isolation habitat (21.02%), bacterial association (13.40%), and  
 254 bacterial taxa (2.82%).

255  
 256 Model criticism suggested that ANOVA assumptions were reasonably met  
 257 (Supplementary Figure 1) despite using proportion data (Warton & Hui, 2011). ANOVA  
 258 on the arc-sine transform of the proportions and a binomial logistic regression provided  
 259 qualitatively similar results (data not shown, see associated code in FigShare repository).

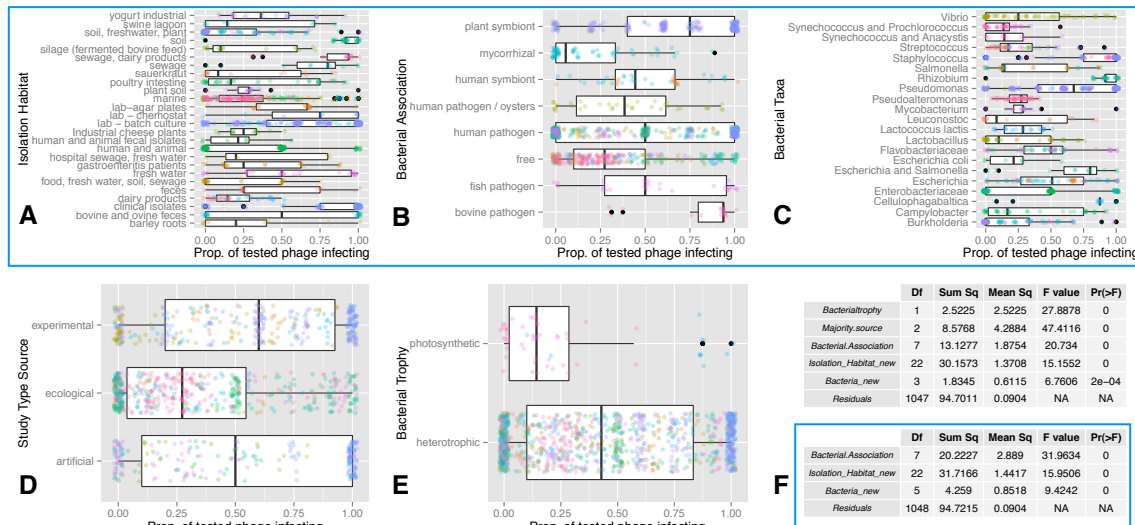

260

261 **Figure 1. Bacterial-phage ecology and identity explain most of the variation in potential coinfection.**  
 262 Potential coinfection is the number of phages that can infect a bacterial host, here measured as the  
 263 proportion of tested phages infecting each host (represented by points). Point colors correspond to hosts in  
 264 the same study. Note data points are offset by a random and small amount (jittered) to enhance visibility  
 265 and reduce overplotting. All factors explaining a statistically significant proportion of the variation in the  
 266 full model are depicted (A-E). Those factors selected after stepwise model selection using AIC are  
 267 indicated with a blue outline around the plot. ANOVA tables for the full and reduced (blue outline) models  
 268 are presented in F.

269

270 ***Integrated viruses limit coinfection of host***  
271 ***cultures by other prophages, but not***  
272 ***extrachromosomal viruses***

273 Virus-virus interactions can occur within cultures  
274 of cells, so I next determined whether integration of  
275 the virus into the host genome affected culture  
276 coinfection. To test whether prophage-infected host  
277 cultures reduced the probability of other viral  
278 infections, I examined all host cultures infected by  
279 prophages. A majority of prophage-infected host  
280 cultures were coinfections (56.48% of  $n = 3,134$ ), a  
281 modest but statistically distinguishable increase  
282 over a 0.5 null (Binomial Exact:  $p = 4.344e^{-13}$ ,  
283 Figure 2A inset). Of these coinfecting host cultures  
284 ( $n=1770$ ), cultures with more than one prophage  
285 (32.54%) were two times less frequent than those  
286 with prophages and extrachromosomal viruses  
287 (Binomial Exact:  $p < 2.2e^{-16}$ , Figure 2A). Therefore,  
288 integrated prophages appear to reduce the chance of  
289 the culture being infected with additional  
290 prophages, but not additional extrachromosomal  
291 viruses. Accordingly, host cultures co-infected  
292 exclusively by extrachromosomal viruses ( $n=675$ )  
293 were infected by  $3.25 \pm 1.34$  viruses, compared to  
294  $2.54 \pm 1.02$  prophages ( $n=575$ ); these quantities  
295 showed a statistically significant difference (Wilcoxon Rank Sum:  $W = 125398.5$ ,  $p <$   
296  $2.2e^{-16}$ , Figure 2B).

297 ***Non-random coinfection of host cultures by ssDNA and dsDNA viruses***  
298 ***suggests mechanisms enhancing coinfection***

299 To determine whether non-random coinfection patterns could increase the likelihood of  
300 coinfection, I tested patterns of ssDNA and dsDNA infection in the hosts using data from  
301 viruses found in NCBI bacterial and archaeal genome sequence data. Coinfecting host  
302 cultures containing ssDNA viruses ( $n = 331$ ), were more likely to have dsDNA or

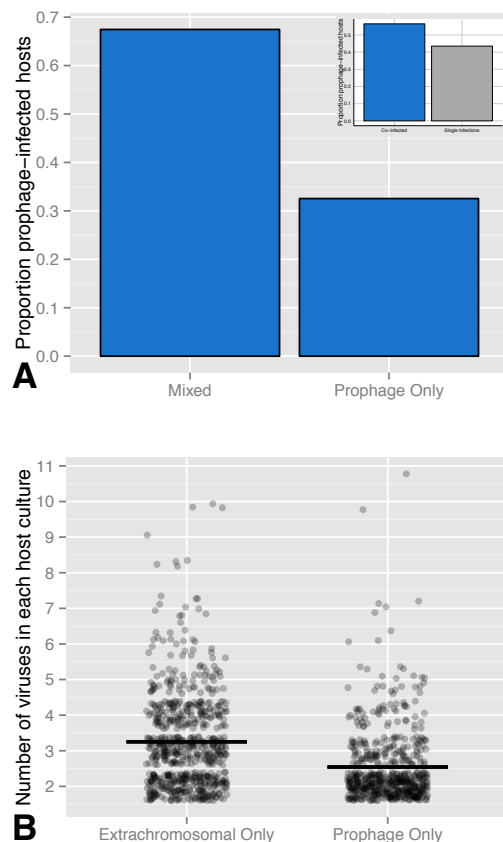

**Figure 2. Host cultures infected with prophages limit coinfection by other prophages, but not extrachromosomal viruses.** A slight, but statistically significant, majority of prophage-infected host cultures were coinfecting (A-inset). Of these, host cultures containing multiple prophages were less frequent than those containing prophages and extrachromosomal (e.g. chronic, carrier state) infections (A). On average (black horizontal bars), extrachromosomal-only coinfections involved more viruses than prophage-only coinfections (B).

303 unclassified viruses (70.69%), than multiple ssDNA infections (exact binomial:  $p=$   
304  $3.314e^{-14}$ ). These coinfections were  $>2$  times more likely to involve at least one dsDNA  
305 viruses than none (exact binomial:  $p = 2.559e^{-11}$ , Figure 3).

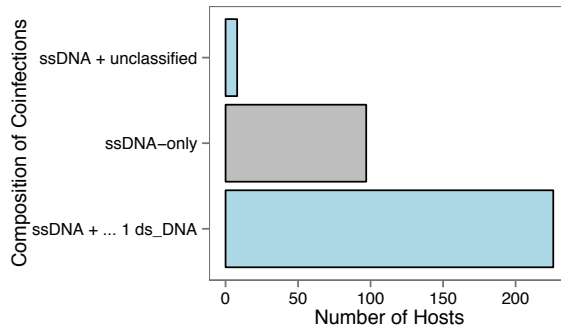

**Figure 3. Culture coinfections between ssDNA-dsDNA viruses are more common than expected by chance.** Host cultures with dsDNA-ssDNA coinfections, were more frequent than ssDNA-only coinfections (shaded in gray).

306

### 307 *Putative defective prophages severely limit coinfection at single cell level*

308 To test whether past infections integrated into the host  
309 genome could affect coinfection of single cells in a  
310 natural environment, I examined a single cell amplified  
311 genomics data set of SUP05 marine bacteria. Cells with  
312 putative defective prophages were less likely to have  
313 current infections: 9.09% of cells with defective  
314 prophages had current infections, compared to 74.55%  
315 of cells that had no prophages (X-squared = 14.2607,  $df$   
316 = 1,  $p$ -value = 0.00015). Bacteria with defective  
317 prophages were currently infected by an average of  $0.09$   
318  $\pm 0.30$  phages, whereas bacteria without prophages

319 were infected by  $1.22 \pm 1.05$  phages (Figure 4A). No  
320 host with defective prophages had current coinfections  
321 (i.e.,  $> 1$  active virus infection).

### 322 *CRISPR spacers limit coinfection at single cell level without spacer matches*

323 In SUP-05 marine bacteria, cells with CRISPR spacers  
324 were also less likely to have current viral infections as  
325 those without spacers (X-squared = 14.0308,  $df = 1$ ,  $p$ -  
326 value = 0.00018). The effects of CRISPR were more  
327

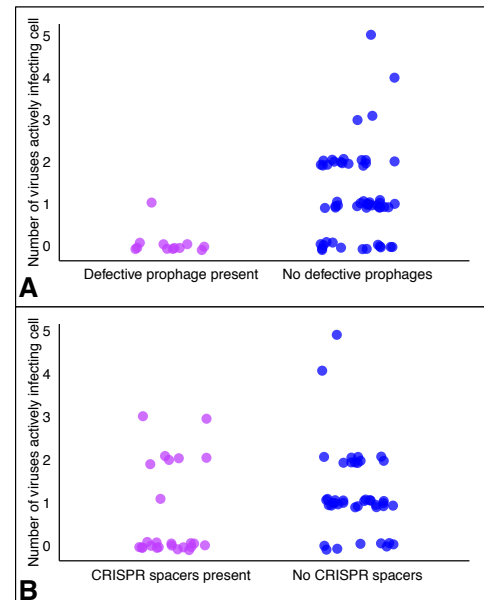

**Figure 4. Past viral infections limit coinfections of single cells of SUP-05 marine bacteria.** Each point represents a bacterial cell; the number of current (active) infections is depicted on the y-axis. A) Prophage-infected cells (left) are less likely to have current infections (note number of points on either side) and are infected by fewer viruses than cells not infected with prophages (right, note higher average number of active viruses). B) Cells with CRISPR spacers are less likely to have current infections and are infected by fewer viruses (left), that cells without CRISPR spacers (right).

328 moderate than defective prophages, with 32.00% of bacteria with CRISPRs having  
329 current viral infections, compared to 80.95% percent of bacteria without CRISPR  
330 spacers. Bacteria with CRISPR spacers had  $0.68 \pm 1.07$  current phage infections  
331 compared to  $1.21 \pm 1.00$  for those without spacers (Figure 4B). In contrast to putative  
332 defective prophages, hosts with CRISPR spacers could have current infections and  
333 coinfections with up to 3 phages.

## 334 **Discussion**

### 335 *Summary of findings*

336 The results of this study provide both a broad scale and a fine-grained examination of the  
337 bacterial and viral factors affecting coinfection dynamics. Across a broad range of taxa  
338 and environments, I found evidence for the importance of bacteria-phage ecology and  
339 bacterial identity in shaping potential coinfection. Across an even broader range of taxa,  
340 results suggest that prophages limit coinfection of cultures by other prophages, but not by  
341 extrachromosomal viruses, providing the most comprehensive test of the phenomenon of  
342 superinfection immunity conferred by lysogens. Conversely, I found evidence of  
343 increased culture coinfection by ssDNA and dsDNA phages, suggesting mechanisms that  
344 may enhance coinfection. At a fine-scale, single cell data enabled testing of the effects of  
345 prophages and CRISPR spacers on coinfection in a natural environment. In light of the  
346 increasing awareness of the widespread occurrence of viral coinfection, this study  
347 provides a foundation for future work on the frequency, mechanisms, and dynamics of  
348 viral coinfection and its ecological and evolutionary consequences.

### 349 *Bacterial correlates of coinfection*

350 Analysis of the factors influencing the potential for coinfection pointed to the importance  
351 of microbial ecology, with isolation habitat of the bacteria/phage pairings explaining the  
352 most variation. This finding suggests that the diverse and complex patterns of bacterial  
353 susceptibility and phage observed at the scale of bacterial species (Holmfeldt *et al.*,  
354 2007), may be best explained by local ecological factors. Bacterial taxon was the only  
355 other factor identified in the most reduced model, but explained little of the variation in  
356 potential coinfection. This could be because the bacteria represented in the host-range  
357 data set were varied predominantly at the strain or species level (Flores *et al.*, 2011),

358 whereas infection patterns are less variable at higher taxonomic scales levels (Flores *et*  
359 *al.*, 2013; Roux *et al.*, 2015). Notably, the type of study strains were selected (i.e.  
360 coevolution experiments, lab strain stocks, or the environment) explained a modest  
361 proportion of variation in the potential for coinfection, suggesting that viral coinfection is  
362 just as important in laboratory settings as in the environment.

363

364 Although all tested factors showed significant statistical associations with the potential  
365 for coinfection, there was still substantial unexplained variation (~65%) in the potential  
366 for coinfection. Thus, these factors should be regarded as starting points for future  
367 experimental examinations. Some of the tested factors were only represented by one  
368 study, limiting the generality of inferences. Moreover, other factors not examined, such  
369 as geography and bacterial phylogeny, could plausibly affect the potential for viral  
370 coinfection. First, the geographic origin of strains can affect infection specificity such  
371 that bacteria isolated from one location are likely to be infected by more phage isolated  
372 from the same location. This result was observed in a study analyzing a spatially explicit  
373 host-phage infection matrix of marine microbes (Flores *et al.*, 2013). This pattern could  
374 be due to the influence of local adaptation of phages to their hosts (Koskella *et al.*, 2011)  
375 and represents an interesting avenue for further research. Second, phylogenetic patterns  
376 are another possible factor influencing potential coinfection. A visual inspection of  
377 published host infection matrices with phylogenies (Koskella & Meaden, 2013; Liu *et al.*,  
378 2015) suggests that particular bacterial lineages can exhibit dramatic differences in the  
379 number of phages able to infect. Further studies with detailed phylogenetic, spatial, and  
380 infection information will be necessary to test the influence of bacterial evolution and  
381 ecology on the potential for coinfection. More importantly, the importance of these  
382 factors in explaining variation in actual coinfections should be determined, as the  
383 potential for coinfection is not necessarily realized.

384

385 Bacterial defense was another important factor influencing coinfection patterns. At a  
386 single cell level, the presence of CRISPR spacers reduced the extent of active viral  
387 infections, even though these spacers matched none of the infecting viruses identified  
388 (Roux *et al.*, 2014). These results provide the first evidence from a natural environment

389 that CRISPR's protective effects extend beyond viruses with exact matches to the  
390 particular spacers within the cell (Fineran *et al.*, 2014; Semanova *et al.*, 2011). Although  
391 very specific sequence matching is thought to be required for CRISPR-Cas-based  
392 immunity (Barrangou *et al.*, 2007; Brouns *et al.*, 2008; Mojica *et al.*, 2005), the system  
393 can tolerate mismatches in protospacers (within and outside of the seed region: Semanova  
394 *et al.*, 2011; Fineran *et al.*, 2014) enabling protection (interference) against related phages  
395 by a mechanism of enhanced spacer acquisition termed priming (Fineran *et al.*, 2014).  
396 The seemingly broader protective effect of CRISPR-Cas beyond specific sequences may  
397 help explain continuing effectiveness of CRISPR-Cas (Fineran *et al.*, 2014) in the face of  
398 rapid viral coevolution for escape (Heidelberg *et al.*, 2009; Andersson & Banfield, 2008;  
399 Tyson & Banfield, 2008).

#### 400 ***The role of virus-virus interactions in coinfection***

401 The results suggest that virus-virus interactions play a role in limiting *and* enhancing  
402 coinfection of cultures and single cells. At the level of host cultures prophages limited  
403 coinfection of host cultures by other prophages, but not extrachromosomal viruses. As  
404 these were culture coinfections and not necessarily single-cell coinfections, these results  
405 are consistent with a single-cell study of *Salmonella* cultures showing that lysogens can  
406 activate cell subpopulations that are transiently immune from viral infection (Cenens *et*  
407 *al.*, 2015). Prophages, more specifically, putative defective prophages, had a more  
408 dramatic impact at the single-cell level in SUP05 marine bacteria, severely limiting active  
409 viral infection and virtually excluding coinfection, extending findings of laboratory  
410 studies to the natural environment. The results on culture-level and single-cell coinfection  
411 come from very different data sets, which should be examined carefully before drawing  
412 general patterns. First, the culture-level data set is composed of an analysis of all publicly  
413 available bacterial and archaeal genome sequences in NCBI databases. These sequences  
414 show a bias towards particular taxonomic groups (e.g. model study species) and those  
415 that are easy to grow in pure culture. However, in some ways this limitation makes the  
416 data set more remarkable, as these host cultures were presumably assumed to be virus-  
417 free (i.e. pure cultures). The single cell data set is limited to just one host type isolated in  
418 a particular environment, as opposed to the 5,444 hosts in the NCBI data set. This  
419 limitation prohibits taxonomic generalizations about the effects on prophages on single

420 cells, but generalizes laboratory findings to a natural environment. Additionally, the  
421 prophages in the single cell study were termed ‘putative defective prophages’ (Roux *et*  
422 *al.*, 2014), which could mean that bacterial domestication of phage functions (Bobay *et*  
423 *al.*, 2014; Asadulghani *et al.*, 2009), rather than phage-phage interactions in a strict sense,  
424 would explain protection from infection in these single cells. In view of these current  
425 limitations, a wider taxonomic and ecological range of culture and single-cell sequence  
426 data should elucidate the role of lysogenic viruses in affecting coinfection dynamics.  
427 Interactions in coinfection between temperate bacteriophages can affect viral fitness  
428 (Refardt, 2011), suggesting latent infections are a profitable avenue for future research on  
429 virus-virus interactions.

430

431 Other virus-virus interactions examined in this study, appeared to increase the chance of  
432 coinfection. While, prophages strongly limited coinfection in single cells, Roux *et al.*’s  
433 (2014) original analysis of this same data set found strong evidence of enhanced  
434 coinfection (i.e. higher than expected by random chance) between dsDNA and ssDNA  
435 Microviridae phages in SUP05\_03 lineage. I extend the taxonomic applicability of this  
436 result by providing evidence that ssDNA-dsDNA culture coinfections occur more  
437 frequently than would be expected by chance. Thus, enhanced coinfection, perhaps due to  
438 the long replicative cycle of some ssDNA viruses (e.g. Inoviridae: Rakonjac *et al.*,  
439 2011), is a major factor explaining findings of phages with chimeric genomes composed  
440 of different types of nucleic acids (Roux *et al.*, 2013; Diemer & Stedman, 2012).  
441 Collectively, these results highlight the importance of virus-virus interactions as part of  
442 the suite of evolved viral strategies to mediate frequent interactions with other viruses,  
443 from limiting to promoting coinfection depending on the evolutionary and ecological  
444 context (Turner & Duffy, 2009).

#### 445 ***Implications and applications***

446 Collectively, these results suggest bacterial ecology and virus-virus interactions are  
447 important drivers of the widespread phenomenon of viral coinfection. An important  
448 implication is that virus-virus interactions will constitute an important selective pressure  
449 on viral evolution. The importance of virus-virus interactions may have been  
450 underappreciated because of an overestimation of the importance of superinfection

451 exclusion (Dulbecco, 1952). Paradoxically, superinfection avoidance may actually  
452 highlight the selective force of virus-virus interactions. In an evolutionary sense, this viral  
453 trait exists precisely because the potential for coinfection is high. If this is correct, then  
454 the variability in the potential for coinfection, as found in this study, suggests that the  
455 manifestation of superinfection exclusion will vary across viral groups according to their  
456 ecological context. Accordingly, some viral mechanisms will promote coinfection, as  
457 found in this study with ssDNA/dsDNA coinfections and other studies (Dang *et al.*, 2004;  
458 Cicin-Sain *et al.*, 2005; Turner *et al.*, 1999). I found substantial variation in potential  
459 coinfection, suggesting that the selective pressure for coinfection is going to vary across  
460 local ecologies. This is in agreement with observations of variation in viral genetic  
461 exchange (which requires coinfection) rates across different geographic localities in a  
462 variety of viruses (Díaz-Muñoz *et al.*, 2013; Trifonov *et al.*, 2009; Held & Whitaker,  
463 2009).

464

465 These results have clear implications, not only for the study of viral ecology in general,  
466 but for practical biomedical and agricultural applications of phages and bacteria. Phage  
467 therapy is often predicated on the specificity of phages on a particular bacterium, but  
468 intentional coinfection could be an important part of the arsenal as part of combined or  
469 cocktail phage therapy. This study also suggests that viral coinfection in the microbiome  
470 should be examined, as part of the influence of the virome as an integral part of the  
471 microbiome (Pride *et al.*, 2012; Minot *et al.*, 2011; Reyes *et al.*, 2010). Finally, if these  
472 results apply in eukaryotic viruses, as evidence suggests (DaPalma *et al.*, 2010), variation  
473 in viral coinfection rates should be considered in the context of treating and preventing  
474 infections, as coinfection likely represents the default condition of human hosts (Wylie *et al.*,  
475 2014). Coinfection and virus-virus interactions have been implicated in changing  
476 disease outcomes for hosts (Vignuzzi *et al.*, 2006), altering epidemiology of viral  
477 diseases (Nelson *et al.*, 2008), and impacting antimicrobial therapies (Birger *et al.*, 2015).  
478 In sum, the results of this study suggest that the ecological context, mechanisms, and  
479 evolutionary consequences of virus-virus interactions should be considered as an  
480 important subfield in the study of viruses.



481 **Acknowledgements**

482 Simon Roux kindly provided extensive assistance with previously published data sets. I  
483 am indebted to Joshua Weitz and Britt Koskella for providing helpful critiques and  
484 advice on an earlier version of this manuscript. A Faculty Fellowship to SLDM from  
485 New York University supported this work.

486 **References**

- 487  
488 Abrahams MR, Anderson JA, Giorgi EE, Seoighe C, Mlisana K, Ping LH, *et al.* (2009).  
489 Quantitating the Multiplicity of Infection with Human Immunodeficiency Virus Type 1  
490 Subtype C Reveals a Non-Poisson Distribution of Transmitted Variants. *J Virol* **83**:3556–  
491 3567.
- 492 Andersson AF, Banfield JF. (2008). Virus population dynamics and acquired virus  
493 resistance in natural microbial communities. *Science* **320**:1047–1050.
- 494 Asadulghani M, Ogura Y, Ooka T, Itoh T, Sawaguchi A, Iguchi A, *et al.* (2009). The  
495 defective prophage pool of Escherichia coli O157: prophage-prophage interactions  
496 potentiate horizontal transfer of virulence determinants. *Plos Pathog* **5**:e1000408.
- 497 Barrangou R, Fremaux C, Deveau H, Richards M, Boyaval P, Moineau S, *et al.* (2007).  
498 CRISPR provides acquired resistance against viruses in prokaryotes. *Science* **315**:1709–  
499 1712.
- 500 Bergh Ø, Børsheim KY, Bratbak G, Heldal M. (1989). High abundance of viruses found  
501 in aquatic environments. *Nature* **340**:467–468.
- 502 Berngruber TW, Weissing FJ, Gandon S. (2010). Inhibition of superinfection and the  
503 evolution of viral latency. *J Virol* **84**:10200–10208.
- 504 Bertani G. (1953). Lysogenic versus lytic cycle of phage multiplication. *Cold Spring*  
505 *Harbor Symposia on Quantitative Biology* **18**:65–70.
- 506 Bertani G. (1954). Studies on lysogenesis. III. Superinfection of lysogenic Shigella  
507 dysenteriae with temperate mutants of the carried phage. *J Bacteriol* **67**:696–707.
- 508 Birger RB, Kouyos RD, Cohen T, Griffiths EC, Huijben S, Mina M, *et al.* (2015). The  
509 potential impact of coinfection on antimicrobial chemotherapy and drug resistance.  
510 *Trends Microbiol* **23**:537–544.
- 511 Bobay L-M, Touchon M, Rocha EPC. (2014). Pervasive domestication of defective  
512 prophages by bacteria. *P Natl Acad Sci-Biol* **111**:12127–12132.
- 513 Brouns SJJ, Jore MM, Lundgren M, Westra ER, Slijkhuis RJH, Snijders APL, *et al.*  
514 (2008). Small CRISPR RNAs guide antiviral defense in prokaryotes. *Science* **321**:960–

- 515 964.
- 516 Cenens W, Makumi A, Govers SK, Lavigne R, Aerts A. (2015). Viral Transmission  
517 Dynamics at Single-Cell Resolution Reveal Transiently Immune Subpopulations Caused  
518 by a Carrier State Association. *PLoS Genet* **11**:e1005770.
- 519 Cicin-Sain L, Podlech J, Messerle M, Reddehase MJ, Koszinowski UH. (2005). Frequent  
520 Coinfection of Cells Explains Functional In Vivo Complementation between  
521 Cytomegalovirus Variants in the Multiply Infected Host. *J Virol* **79**:9492–9502.
- 522 Dang Q, Chen JB, Unutmaz D, Coffin JM, Pathak VK, Powell D, *et al.* (2004).  
523 Nonrandom HIV-1 infection and double infection via direct and cell-mediated pathways.  
524 *Proc Natl Acad Sci U S A* **101**:632–637.
- 525 DaPalma T, Doonan BP, Trager NM, Kasman LM. (2010). A systematic approach to  
526 virus-virus interactions. *Virus Research* **149**:1–9.
- 527 Delbruck M. (1946). Bacterial viruses or bacteriophages. *Biological Reviews* **21**:30–40.
- 528 Diemer GS, Stedman KM. (2012). A novel virus genome discovered in an extreme  
529 environment suggests recombination between unrelated groups of RNA and DNA  
530 viruses. *Biology Direct* **7**:13.
- 531 Díaz-Muñoz SL, Koskella B. (2014). Bacteria–Phage Interactions in Natural  
532 Environments. *Advances in Applied Microbiology* **89**:135–183.
- 533 Díaz-Muñoz SL, Tenailon O, Goldhill D, Brao K, Turner PE, Chao L. (2013).  
534 Electrophoretic mobility confirms reassortment bias among geographic isolates of  
535 segmented RNA phages. *BMC Evol Biol* **13**:206.
- 536 Dropulić B, Hěrmánková M, Pitha PM. (1996). A conditionally replicating HIV-1 vector  
537 interferes with wild-type HIV-1 replication and spread. *Proc Natl Acad Sci U S A*  
538 **93**:11103–11108.
- 539 Dulbecco R. (1952). Mutual exclusion between related phages. *J Bacteriol* **63**:209–217.
- 540 Ellis EL, Delbruck M. (1939). The growth of bacteriophage. *J Gen Physiol* **22**:365–384.
- 541 Fineran PC, Gerritzen MJH, Suárez-Diez M, Künne T, Boekhorst J, van Hijum SAFT, *et*  
542 *al.* (2014). Degenerate target sites mediate rapid primed CRISPR adaptation. *P Natl Acad*  
543 *Sci-Biol* **111**:E1629–38.
- 544 Flores CO, Meyer JR, Valverde S, Farr L, Weitz JS. (2011). Statistical structure of host–  
545 phage interactions. *Proc Natl Acad Sci U S A* **108**:E288–E297.
- 546 Flores CO, Valverde S, Weitz JS. (2013). Multi-scale structure and geographic drivers of  
547 cross-infection within marine bacteria and phages. *The ISME Journal* **7**:520–532.

- 548 Ghedin E, Sengamalay NA, Shumway M, Zaborsky J, Feldblyum T, Subbu V, *et al.*  
549 (2005). Large-scale sequencing of human influenza reveals the dynamic nature of viral  
550 genome evolution. *Nature* **437**:1162–1166.
- 551 Heidelberg JF, Nelson WC, Schoenfeld T, Bhaya D. (2009). Germ warfare in a microbial  
552 mat community: CRISPRs provide insights into the co-evolution of host and viral  
553 genomes. *Plos One*.
- 554 Held NL, Whitaker RJ. (2009). Viral biogeography revealed by signatures in *Sulfolobus*  
555 *islandicus* genomes. *Environmental Microbiology* **11**:457–466.
- 556 Holmfeldt K, Middelboe M, Nybroe O, Riemann L. (2007). Large variabilities in host  
557 strain susceptibility and phage host range govern interactions between lytic marine  
558 phages and their *Flavobacterium* hosts. *Applied and Environmental Microbiology*  
559 **73**:6730–6739.
- 560 Horvath P, Barrangou R. (2010). CRISPR/Cas, the immune system of bacteria and  
561 archaea. *Science* **327**:167–170.
- 562 Joseph SB, Hanley KA, Chao L, Burch CL. (2009). Coinfection rates in phi 6  
563 bacteriophage are enhanced by virus-induced changes in host cells. *Evol Appl* **2**:24–31.
- 564 Koskella B, Meaden S. (2013). Understanding bacteriophage specificity in natural  
565 microbial communities. *Viruses* **5**:806–823.
- 566 Koskella B, Thompson JN, Preston GM, Buckling A. (2011). Local Biotic Environment  
567 Shapes the Spatial Scale of Bacteriophage Adaptation to Bacteria. *The American*  
568 *Naturalist* **177**:440–451.
- 569 Labonté JM, Swan BK, Poulos B, Luo H, Koren S, Hallam SJ, *et al.* (2015). Single-cell  
570 genomics-based analysis of virus-host interactions in marine surface bacterioplankton.  
571 *The ISME Journal* **9**:2386–2399.
- 572 Leggett HC, Benmayor R, Hodgson DJ, Buckling A. (2013). Experimental evolution of  
573 adaptive phenotypic plasticity in a parasite. *Current Biology* **23**:139–142.
- 574 Li C, Hatta M, Nidom CA, Muramoto Y, Watanabe S, Neumann G, *et al.* (2010).  
575 Reassortment between avian H5N1 and human H3N2 influenza viruses creates hybrid  
576 viruses with substantial virulence. *P Natl Acad Sci-Biol* **107**:4687–4692.
- 577 Linn S, Arber W. (1968). Host specificity of DNA produced by *Escherichia coli*, X. In  
578 vitro restriction of phage fd replicative form. *Proc Natl Acad Sci U S A* **59**:1300–1306.
- 579 Liu J, Yan R, Zhong Q, Ngo S, Bangayan NJ, Nguyen L, *et al.* (2015). The diversity and  
580 host interactions of *Propionibacterium acnes* bacteriophages on human skin. *The ISME*  
581 *Journal*.
- 582 Minot S, Sinha R, Chen J, Li H, Keilbaugh SA, Wu GD, *et al.* (2011). The human gut

- 583 virome: Inter-individual variation and dynamic response to diet. *Genome Research*  
584 **21**:1616–1625.
- 585 Mojica FJM, Díez-Villaseñor C, García-Martínez J, Soria E. (2005). Intervening  
586 sequences of regularly spaced prokaryotic repeats derive from foreign genetic elements. *J*  
587 *Mol Evol* **60**:174–182.
- 588 Murray NE. (2002). 2001 Fred Griffith review lecture. Immigration control of DNA in  
589 bacteria: self versus non-self. *Microbiology (Reading, Engl)* **148**:3–20.
- 590 Nelson MI, Viboud C, Simonsen L, Bennett RT, Griesemer SB, St George K, *et al.*  
591 (2008). Multiple Reassortment Events in the Evolutionary History of H1N1 Influenza A  
592 Virus Since 1918 Kawaoka, Y (ed). *Plos Pathog* **4**:e1000012.
- 593 Pride DT, Salzman J, Haynes M, Rohwer F, Davis-Long C, White RA, *et al.* (2012).  
594 Evidence of a robust resident bacteriophage population revealed through analysis of the  
595 human salivary virome. *The ISME Journal* **6**:915–926.
- 596 Rakonjac J, Bennett NJ, Spagnuolo J, Gagic D, Russel M. (2011). Filamentous  
597 bacteriophage: biology, phage display and nanotechnology applications. *Curr Issues Mol*  
598 *Biol* **13**:51–76.
- 599 Refardt D. (2011). Within-host competition determines reproductive success of temperate  
600 bacteriophages. *The ISME Journal* **5**:1451–1460.
- 601 Reyes A, Haynes M, Hanson N, Angly FE, Heath AC, Rohwer F, *et al.* (2010).  
602 nature09199. *Nature* **466**:334–338.
- 603 Rohwer F, Barott K. (2012). Viral information. *Biol Philos* **28**:283–297.
- 604 Roux S, Enault F, Bronner G, Vaulot D, Forterre P, Krupovic M. (2013). Chimeric  
605 viruses blur the borders between the major groups of eukaryotic single-stranded DNA  
606 viruses. *Nature Communications* **4**:2700.
- 607 Roux S, Hallam SJ, Woyke T, Sullivan MB. (2015). Viral dark matter and virus-host  
608 interactions resolved from publicly available microbial genomes. *eLife* **4**.
- 609 Roux S, Hawley AK, Torres Beltran M, Scofield M, Schwientek P, Stepanauskas R, *et al.*  
610 (2014). Ecology and evolution of viruses infecting uncultivated SUP05 bacteria as  
611 revealed by single-cell- and meta- genomics. *eLife* **3**.
- 612 Roux S, Krupovic M, Poulet A, Debroas D, Enault F. (2012). Evolution and diversity of  
613 the Microviridae viral family through a collection of 81 new complete genomes  
614 assembled from virome reads. *Plos One* **7**:e40418.
- 615 Semenova E, Jore MM, Datsenko KA, Semenova A, Westra ER, Wanner B, *et al.* (2011).  
616 Interference by clustered regularly interspaced short palindromic repeat (CRISPR) RNA  
617 is governed by a seed sequence. *P Natl Acad Sci-Biol* **108**:10098–10103.

- 618 Suttle CA. (2007). Marine viruses--major players in the global ecosystem. *Nature*  
619 *Reviews Microbiology* **5**:801–812.
- 620 Team RDC. (2011). R: A Language and Environment for Statistical Computing.
- 621 Trifonov V, Khiabani H, Rabadan R. (2009). Geographic dependence, surveillance,  
622 and origins of the 2009 influenza A (H1N1) virus. *N Engl J Med* **361**:115–119.
- 623 Turner P, Burch C, Hanley K, Chao L. (1999). Hybrid frequencies confirm limit to  
624 coinfection in the RNA bacteriophage phi 6. *J Virol* **73**:2420–2424.
- 625 Turner P, Chao L. (2003). Escape from Prisoner's Dilemma in RNA phage phi 6. *Am Nat*  
626 **161**:497–505.
- 627 Turner P, Chao L. (1999). Prisoner's dilemma in an RNA virus. *Nature* **398**:441–443.
- 628 Turner P, Chao L. (1998). Sex and the evolution of intrahost competition in RNA virus  
629 phi 6. *Genetics* **150**:523–532.
- 630 Turner PE, Duffy S. (2009). Evolutionary ecology of multiple phage adsorption and  
631 infection. In: *Bacteriophage Ecology: Population Growth, Evolution, and Impact of*  
632 *Bacterial Viruses*, Abedon, ST (ed), Cambridge University Press: Cambridge.
- 633 Tyson GW, Banfield JF. (2008). Rapidly evolving CRISPRs implicated in acquired  
634 resistance of microorganisms to viruses. *Environmental Microbiology* **10**:200–207.
- 635 Vignuzzi M, Stone JK, Arnold JJ, Cameron CE, Andino R. (2006). Quasispecies  
636 diversity determines pathogenesis through cooperative interactions in a viral population.  
637 *Nature* **439**:344–348.
- 638 Warton DI, Hui FKC. (2011). The arcsine is asinine: the analysis of proportions in  
639 ecology. *Ecology* **92**:3–10.
- 640 Weinbauer MG. (2004). Ecology of prokaryotic viruses. *FEMS Microbiol Rev* **28**:127–  
641 181.
- 642 Worobey M, Holmes EC. (1999). Evolutionary aspects of recombination in RNA viruses.  
643 *J Gen Virol* **80** ( Pt 10):2535–2543.
- 644 Wylie KM, Mihindukulasuriya KA, Zhou Y, Sodergren E, Storch GA, Weinstock GM.  
645 (2014). Metagenomic analysis of double-stranded DNA viruses in healthy adults. *BMC*  
646 *Biol* **12**:71.
- 647
